# Supplementary material for: Lithium salt additives and the influence of their counterion on the performances of light-emitting electrochemical cells
Source: Royal Society of Chemistry journal article supplement (doi:10.1039/c6tc03597c), 2016-01-01
Supplement: c6tc03597c1.pdf [file c6tc03597c1.pdf]

## Lithium salts additives and the influence of their counterion on the performances of light-emitting electrochemical cells

### SUPPORTING INFORMATIONS

E. Bandiello, M.Sessolo\* and H. J. Bolink

*Instituto de Ciencia Molecular, Universidad de Valencia. Catedrático José Beltrán Martínez 2,  
46980, Paterna, Valencia (Spain).*

[\\*michele.sessolo@uv.es](mailto:michele.sessolo@uv.es)

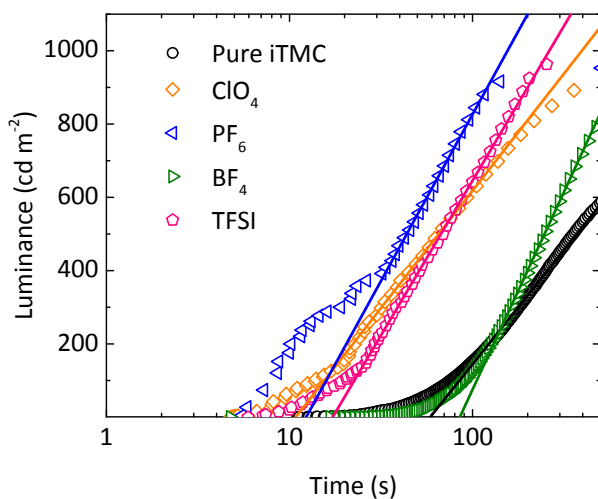

**Figure S1.** Fit of the linear increase of the luminance in a logarithmic time scale.

| <b>Salt</b>        | <b>Luminance increase (cd m<sup>-2</sup> dec<sup>-1</sup>)</b> |
|--------------------|----------------------------------------------------------------|
| Pure iTMC          | 624.00                                                         |
| LiClO <sub>4</sub> | 639.85                                                         |
| LiPF <sub>6</sub>  | 908.86                                                         |
| LiBF <sub>4</sub>  | 1080.31                                                        |
| LiTFSI             | 844.89                                                         |

**Table S1.** Slope of the linear part of the luminance in a logarithmic time scale (linear fit).

| <b>Additive</b>          | <b>Avg. <math>L_{\max}</math> (cd m<sup>-2</sup>)</b> | <b>Avg. <math>t_{100}</math> (s)</b> | <b>Avg. <math>t_{1/2}</math> (h)</b> |
|--------------------------|-------------------------------------------------------|--------------------------------------|--------------------------------------|
| <b>None</b>              | 711.3 ± 33.9                                          | 83.66 ± 11.14                        | 47.19 ± 1.28                         |
| <b>LiClO<sub>4</sub></b> | 918.5 ± 26.2                                          | 14.48 ± 0.73                         | 19.14 ± 1.82                         |
| <b>LiPF<sub>6</sub></b>  | 998.7 ± 64.3                                          | 7.45 ± 1.62                          | 1095.15 ± 237.38                     |
| <b>LiBF<sub>4</sub></b>  | 915.1 ± 77.78                                         | 85.41 ± 8.88                         | 1903.05 ± 97.79                      |
| <b>LiTFSI</b>            | 1000.1 ± 26.9                                         | 31.59 ± 14.33                        | 378.08 ± 31.07                       |

**Table S2.** Average luminance, turn-on time and lifetime values with their standard deviation, calculated over three different pixels for LECs employing different Li additives.
